# Supplementary material for: Chiral gold nanoparticles enantioselectively rescue memory deficits in a mouse model of Alzheimer’s disease
Source: PubMed Central journal article supplement (PMC7509831; doi:10.1038/s41467-020-18525-2), 2020-09-22
Supplement: 41467_2020_18525_MOESM3_ESM.pdf [file 41467_2020_18525_MOESM3_ESM.pdf]

## **Description of Additional Supplementary Files**

File Name: Supplementary Movie 1

Description: Representative motion path of WT mice on the fifth day of training in MWM test.

File Name: Supplementary Movie 2

Description: Representative motion path of AD mice on the fifth day of training in MWM test.

File Name: Supplementary Movie 3

Description: Representative motion path of L3.3-treated AD mice on the fifth day of training in MWM test.

File Name: Supplementary Movie 4

Description: Representative motion path of D3.3-treated AD mice on the fifth day of training in MWM test.

File Name: Supplementary Movie 5

Description: Representative motion path of WT mice in the probe trial of MWM test.

File Name: Supplementary Movie 6

Description: Representative motion path of AD mice in the probe trial of MWM test.

File Name: Supplementary Movie 7

Description: Representative motion path of L3.3-treated AD mice in the probe trial of MWM test.

File Name: Supplementary Movie 8

Description: Representative motion path of D3.3-treated AD mice in the probe trial of MWM test.
